# Supplementary material
Source: PubMed Central journal article supplement (PMC5837900)
Supplement: NIHMS872181-supplement-supplement_1.pdf [file NIHMS872181-supplement-supplement_1.pdf]

1 **Supplementary Table 1. Participant characteristics among GDM cases and matched controls.**

| Characteristics                                          | GDM cases ( <i>n</i> = 107) | Controls ( <i>n</i> = 214) | <i>P</i> * |
|----------------------------------------------------------|-----------------------------|----------------------------|------------|
| Age (years)                                              | 30.5 ± 5.7                  | 30.4 ± 5.4                 |            |
| Race/ethnicity                                           |                             |                            |            |
| Non-Hispanic White                                       | 25 (23.4)                   | 50 (23.4)                  |            |
| Non-Hispanic Black                                       | 15 (14.0)                   | 30 (14.0)                  |            |
| Hispanic                                                 | 41 (38.3)                   | 82 (38.3)                  |            |
| Asian/Pacific Islander                                   | 26 (24.3)                   | 52 (24.3)                  |            |
| Education                                                |                             |                            | 0.18       |
| Less than high school                                    | 17 (15.9)                   | 26 (12.1)                  |            |
| High school graduate or equivalent                       | 15 (14.0)                   | 23 (10.7)                  |            |
| More than high school                                    | 75 (70.1)                   | 165 (77.1)                 |            |
| Insurance                                                |                             |                            | 0.43       |
| Private or managed care                                  | 68 (63.5)                   | 143 (66.8)                 |            |
| Medicaid, other                                          | 39 (36.5)                   | 69 (32.2)                  |            |
| Self-pay                                                 | 0                           | 2 (0.9)                    |            |
| Marital status                                           |                             |                            | 0.12       |
| Never married                                            | 11 (10.3)                   | 35 (16.4)                  |            |
| Married/living with a partner                            | 92 (86.0)                   | 167 (78.0)                 |            |
| Divorced/separated                                       | 4 (3.7)                     | 12 (5.6)                   |            |
| Nulliparity                                              | 48 (44.9)                   | 96 (44.9)                  | 1.00       |
| Family history of diabetes                               | 40 (37.4)                   | 48 (22.4)                  | 0.003      |
| Pre-pregnancy body mass index, kg/m <sup>2</sup>         |                             |                            | <0.001     |
| <25.0                                                    | 37 (34.6)                   | 123 (57.5)                 |            |
| 25.0 - 29.9                                              | 35 (32.7)                   | 56 (26.2)                  |            |
| 30.0 - 34.9                                              | 20 (18.7)                   | 17 (7.9)                   |            |
| 35.0 - 44.9                                              | 15 (14.0)                   | 16 (7.5)                   |            |
| Unknown/missing                                          | 0                           | 2 (0.9)                    |            |
| Smoking 6 months before pregnancy                        | 4 (3.7)                     | 1 (0.5)                    | 0.06       |
| Alcoholic beverage consumption 3 months before pregnancy | 61 (57.0)                   | 137 (64.0)                 | 0.22       |

2

3 Data are presented as n (%) for categorical variables and mean (SD) for continuous variables.

4 \**P* values for differences between case and control subjects were obtained by mixed-effect linear

5 regression models for continuous variables and binomial/multinomial logistic regression with generalized

6 estimating equations for binary/multilevel categorical variables, accounting for matched case-control

7 pairs. *P* values are not shown for matching variables (age and race/ethnicity).
